# Supplementary material
Source: Springer Nature journal article supplement (https://www.springermedizin.de/resource/supplementary/12882_2011_362_MOESM6_ESM.pdf/9453656)
Supplement: MOESM6 [file 9453656]

| ID | Score | Focus Molecules | Top Functions                                                                                                       |
|----|-------|-----------------|---------------------------------------------------------------------------------------------------------------------|
| 1  | 61    | 32              | Energy Production, Small Molecule Biochemistry, Genetic Disorder                                                    |
| 2  | 55    | 30              | Molecular Transport, Small Molecule Biochemistry, Cellular Function and Maintenance                                 |
| 3  | 44    | 26              | Cellular Compromise, Cellular Assembly and Organization, Cellular Function and Maintenance                          |
| 4  | 39    | 24              | Cell-To-Cell Signaling and Interaction, Nervous System Development and Function, Cellular Assembly and Organization |
| 5  | 33    | 21              | Genetic Disorder, Neurological Disease, Metabolic Disease                                                           |
| 6  | 23    | 17              | Cellular Assembly and Organization, RNA Post-Transcriptional Modification, Protein Synthesis                        |
| 7  | 19    | 14              | Cellular Development, DNA Replication, Recombination, and Repair, Nucleic Acid Metabolism                           |
| 8  | 19    | 14              | Gene Expression, Genetic Disorder, Metabolic Disease                                                                |
| 9  | 17    | 13              | Carbohydrate Metabolism, Molecular Transport, Small Molecule Biochemistry                                           |
| 10 | 16    | 13              | RNA Post-Transcriptional Modification, Cell Death, Post-Translational Modification                                  |
| 11 | 15    | 12              | RNA Post-Transcriptional Modification, Cellular Function and Maintenance, Carbohydrate Metabolism                   |
| 12 | 15    | 12              | Carbohydrate Metabolism, Nucleic Acid Metabolism, Small Molecule Biochemistry                                       |
| 13 | 15    | 12              | Genetic Disorder, Hepatic System Disease, Liver Cholestasis                                                         |
| 14 | 14    | 11              | Gene Expression, Lipid Metabolism, Molecular Transport                                                              |
| 15 | 12    | 10              | Cell Signaling, Infection Mechanism, Cell Death                                                                     |
| 16 | 2     | 1               | Genetic Disorder                                                                                                    |
| 17 | 2     | 1               | Genetic Disorder, Metabolic Disease, Lipid Metabolism                                                               |
| 18 | 2     | 1               | Molecular Transport, Protein Trafficking                                                                            |
| 19 | 2     | 1               | Lipid Metabolism, Nucleic Acid Metabolism, Small Molecule Biochemistry                                              |
| 20 | 2     | 1               | Cell Morphology, Cancer, Reproductive System Disease                                                                |
| 21 | 2     | 1               | Cancer, Cellular Development, Skeletal and Muscular System Development and Function                                 |
| 22 | 2     | 1               | Genetic Disorder, Neurological Disease, Small Molecule Biochemistry                                                 |
| 23 | 2     | 1               | Lipid Metabolism, Small Molecule Biochemistry                                                                       |
| 24 | 1     | 1               | Cancer, Genetic Disorder, Hepatic System Disease                                                                    |
| 25 | 1     | 1               | DNA Replication, Recombination, and Repair, Cellular Compromise, Cell Death                                         |

**Table 4.** The rank list of the metabolic networks which encompass differentially expressed genes between ROP-Os/+ and C57-Os/+. Genes from the SAGE kidney libraries, which met the 2-fold difference in expression level cut-off between ROP-Os/+ and C57-Os/+ were assigned biological functions using the Ingenuity Pathways Knowledge Base. A right-tailed Fisher's exact test was used to calculate a p-value describing the probability that each biological function assigned to that network is due to chance alone. Networks were ranked according to the combinatorial p-value of differentially expressed genes represented in the network. Corresponding network diagrams are shown as supplemental figures S3-S14.
